# Supplementary material
Source: PubMed Central journal article supplement (PMC4788101)
Supplement: NIHMS765325-supplement-S2.pdf [file NIHMS765325-supplement-S2.pdf]

A

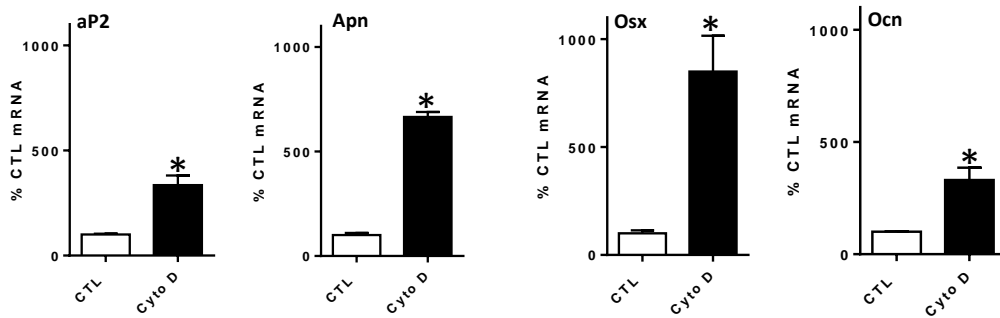

B

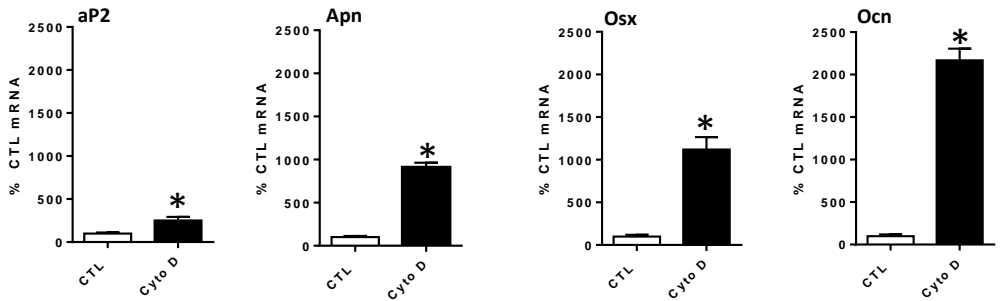

**Figure S2. A.** mdMSC were cultured in growth medium for 5 days and RT-PCR performed for adipogenic genes aP2 and adiponectin and osteogenic genes Osx and Ocn. **B.** When cultured under osteogenic conditions, expression of Os and Ocn outpace adipogenic genes at 5 days. Significant differences from control are shown by \* =  $p < 0.01$ .
