# Supplementary material
Source: PubMed Central journal article supplement (PMC4788101)
Supplement: NIHMS765325-supplement-S3.pdf [file NIHMS765325-supplement-S3.pdf]

A

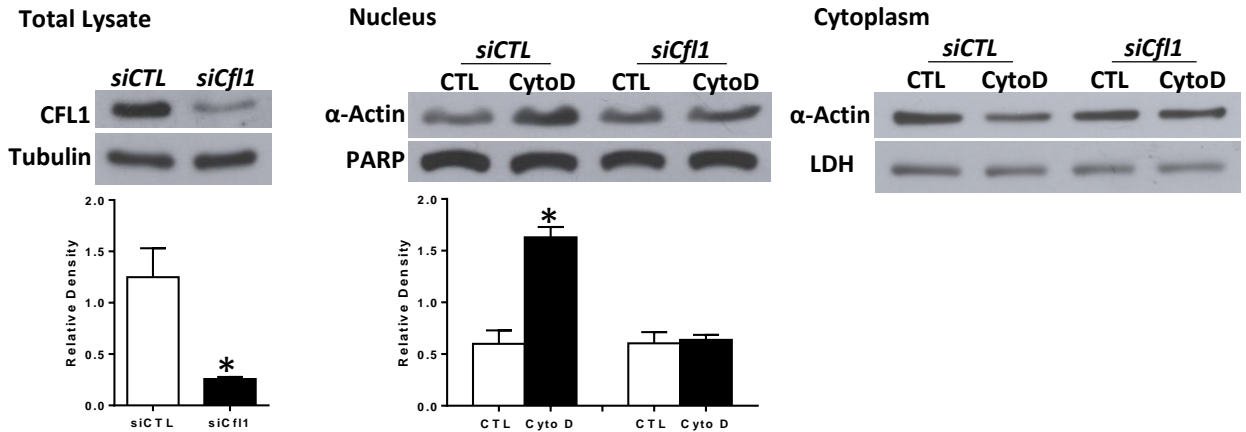

B

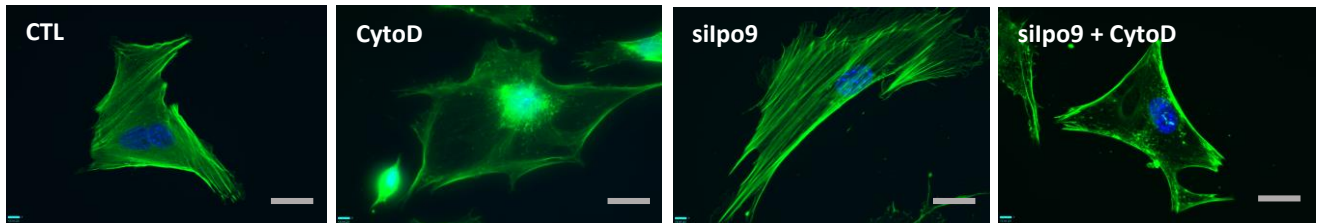

C

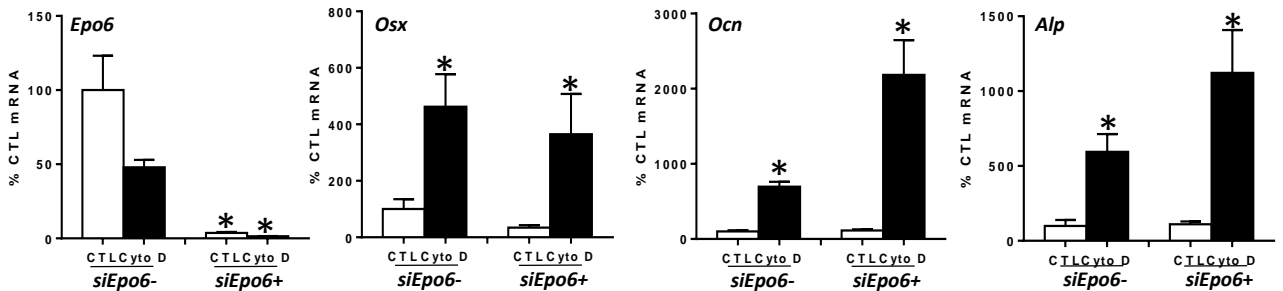**Figure S3.**

**A.** Left panel shows cell lysate with knock-down of CFL1. 3 experiments assessed for densitometry of cofilin 1, shown in graphs under the image. \*= $p < 0.05$ . Right panels show nuclear and cytoplasmic IB after cofilin 1 knock-down. 3 experiments assessed for densitometry of nuclear actin, shown in graphs under the image. \*= $p < 0.05$ . **B.** mdMSC in osteogenic medium stained with phalloidin after importin 9 knock-down. Scale bars = 25 $\mu$ m. **C.** RT-PCR after siRNA knock-down of exportin 6. Asterisk indicates significant difference,  $p < 0.01$ .
