# Supplementary material
Source: PubMed Central journal article supplement (PMC4788101)
Supplement: NIHMS765325-supplement-S4.pdf [file NIHMS765325-supplement-S4.pdf]

A.

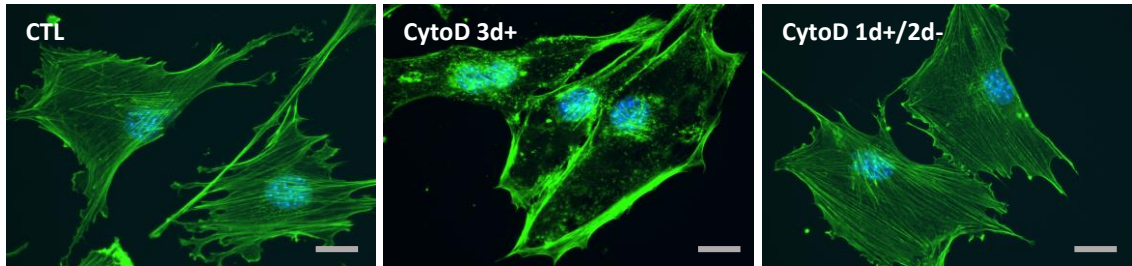

B.

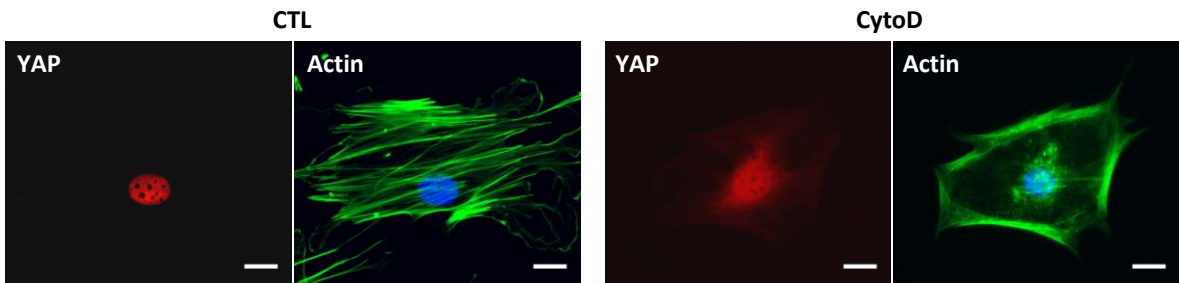**Figure S4.**

A. mdMSC treated as in Fig 3F, phalloidin stain. Scale bars = 25 $\mu$ M.

B. mdMSC treated with CytoD, YAP and phalloidin stain. Scale bars = 25 $\mu$ M
