# Supplementary material
Source: PubMed Central journal article supplement (PMC4788101)
Supplement: NIHMS765325-supplement-S5.pdf [file NIHMS765325-supplement-S5.pdf]

A

Trabecular CTL

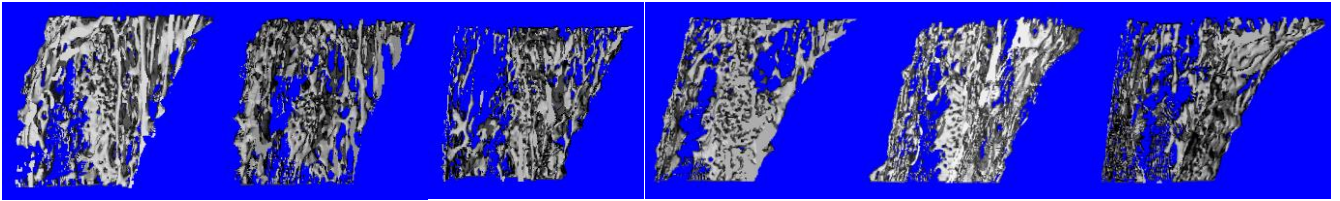

Trabecular CytoD

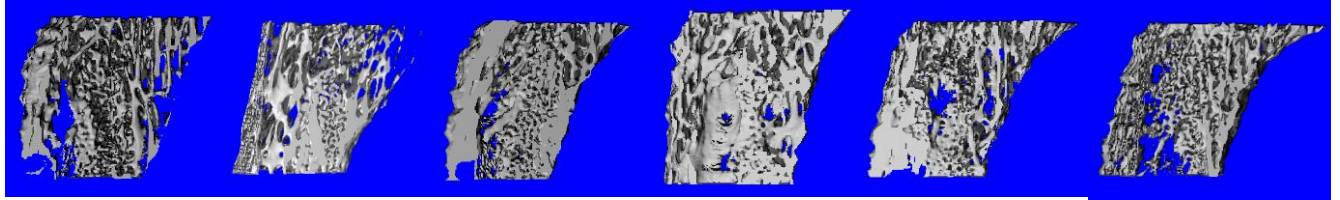

B

Cortical CTL

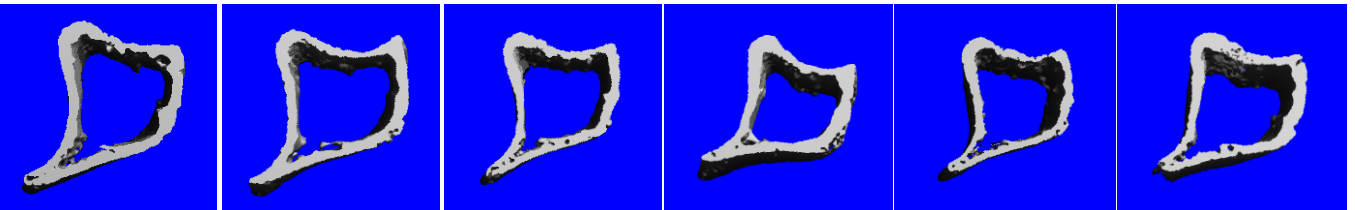

Cortical CytoD

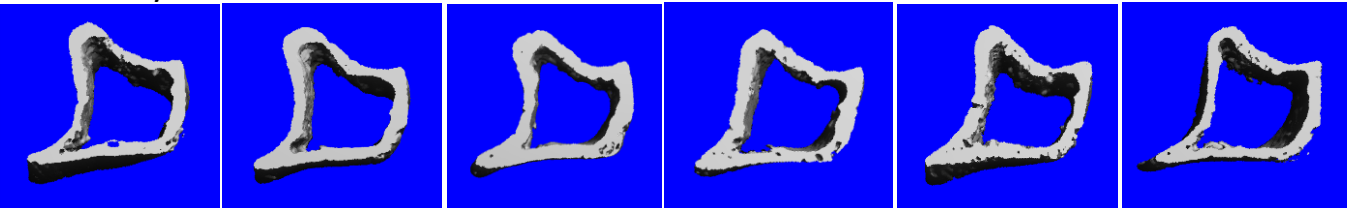**Figure S5.**

**A.** Vertical sections of reconstructed trabecular bones. **B.** Cross sections of reconstructed cortical bones.
